# Supplementary material for: Sensor with strong solid emission for fluorescence colormetric detection of 1, 4-dioxane in Water and vapor based on the Keto-Enol isomerisation
Source: Research Square preprint supplement (doi:10.21203/rs.3.rs-5824424/v1), 2025-01-15
Supplement: Supplementary file 1 [file 4655bfbc8849543bc0054109.docx]

**Supplementary Material**

**Sensor with strong solid emission for fluorescence colormetric detection of 1,4 dioxane in Water and vapor based on the**

**Keto-Enol isomerisation**

Jing Wang1, Zi-Ao Zong2, Shi-Fu Huang1, Mohd. Muddassir4, Zhi-Yong Xing1, Na-Na Li2,3,* Wen-Qiong Jiang5, 6,*

1Modern Industrial College of Biomedicine and Great Health, Youjiang Medical University for Nationalities, Baise 533000, China

# 2Key Laboratory of Research on Environment and Population Health in aluminium mining areas (Youjiang Medical University for Nationalities), Education Department of Guangxi Zhuang Autonomous Region, Baise, China

3Department of Chemistry, Xinzhou Normal University, Xinzhou, Shanxi 034000, PR China

4Department of Chemistry, College of Science, King Saud University, Riyadh 11451, Saudi Arabia

5Affiliated Hospital of Youjiang Medical University for Nationalities, Baise 533000 Guangxi, PR China

6Guangxi Key Laboratory for Biomedical Material Research, Baise 533000 Guangxi, PR China

*Correspondence: [LMT13643562571@126.c](mailto:LMT13643562571@126.COM)om (N.-N. Li); [2901058890@qq.com](mailto:2901058890@qq.com) (Wen Qiong Jiang)

† These authors contributed equally to this work.

**Materials and analysis**.

1H NMR spectra were recorded on a Bruck AV-600 spectrometer in *d6*-DMSO. IR spectra were performed with a Perkin-Elmer IR spectrophotometer. Pgeneral TU-2550 UV-vis spectrophotometer and Perkin Elmer LS55 fluorescence spectrometer were employed to measure absorption and fluorescence spectra, respectively. Mass spectrum was acquired with an Agilent 6220 Quadruple LC/MS (Agilent Co, USA). Elemental analyses (C, H, N and S) were conducted with a 2400 model Perkin-Elmer analyzer.

For fluorescence measurements, excitation wavelength was 360 nm and the excitation and emission wavelength band passes were both set at 5 nm and 5 nm.


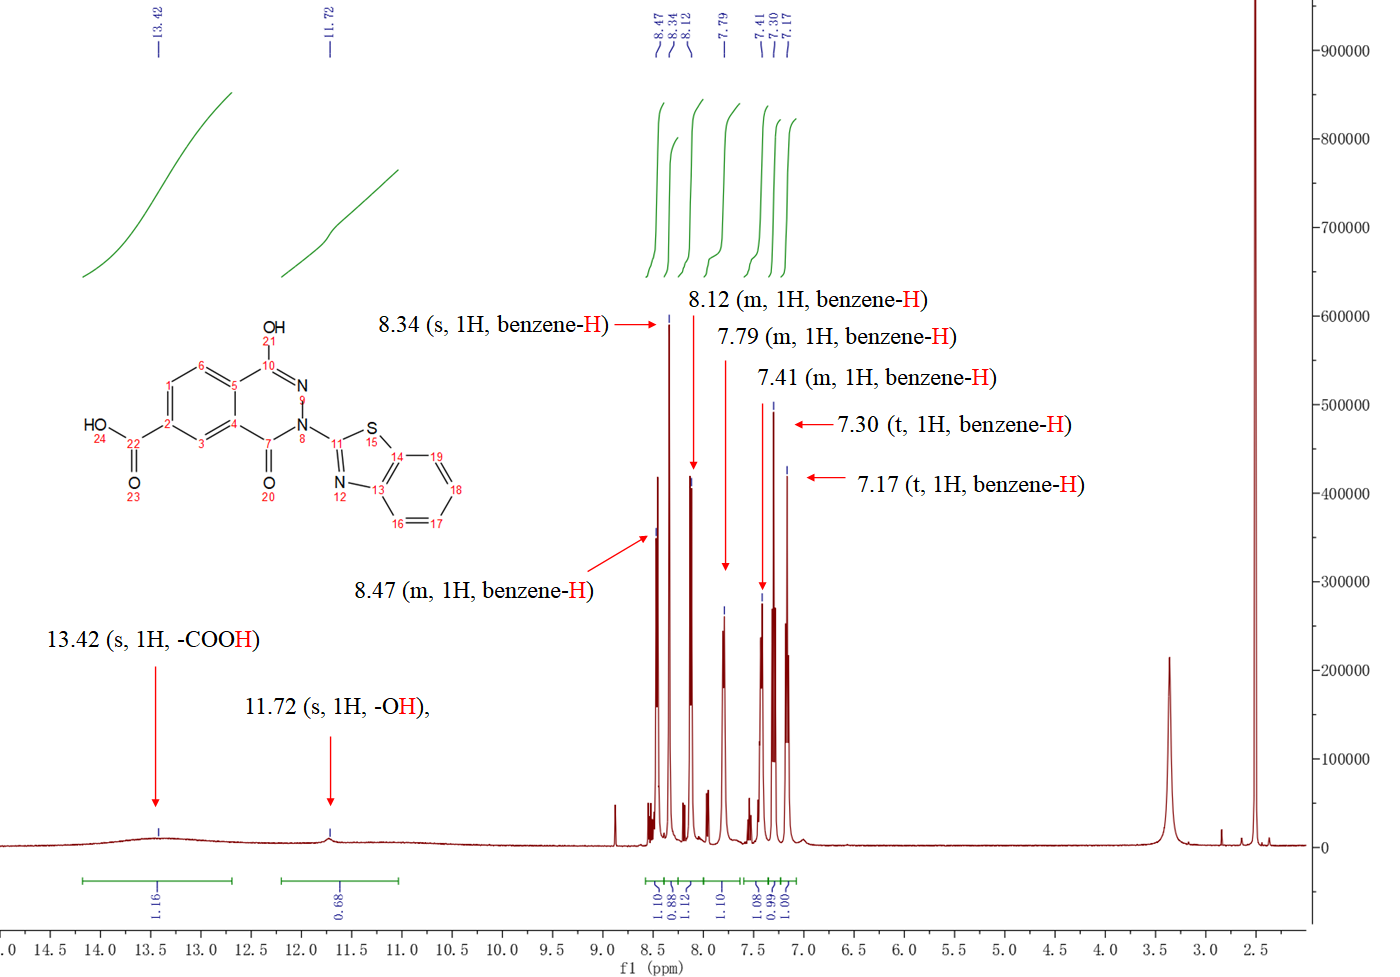


**Fig. S1.** 1H NMR (DMSO-*d*6, 600 MHz) spectra of **BPCA**.


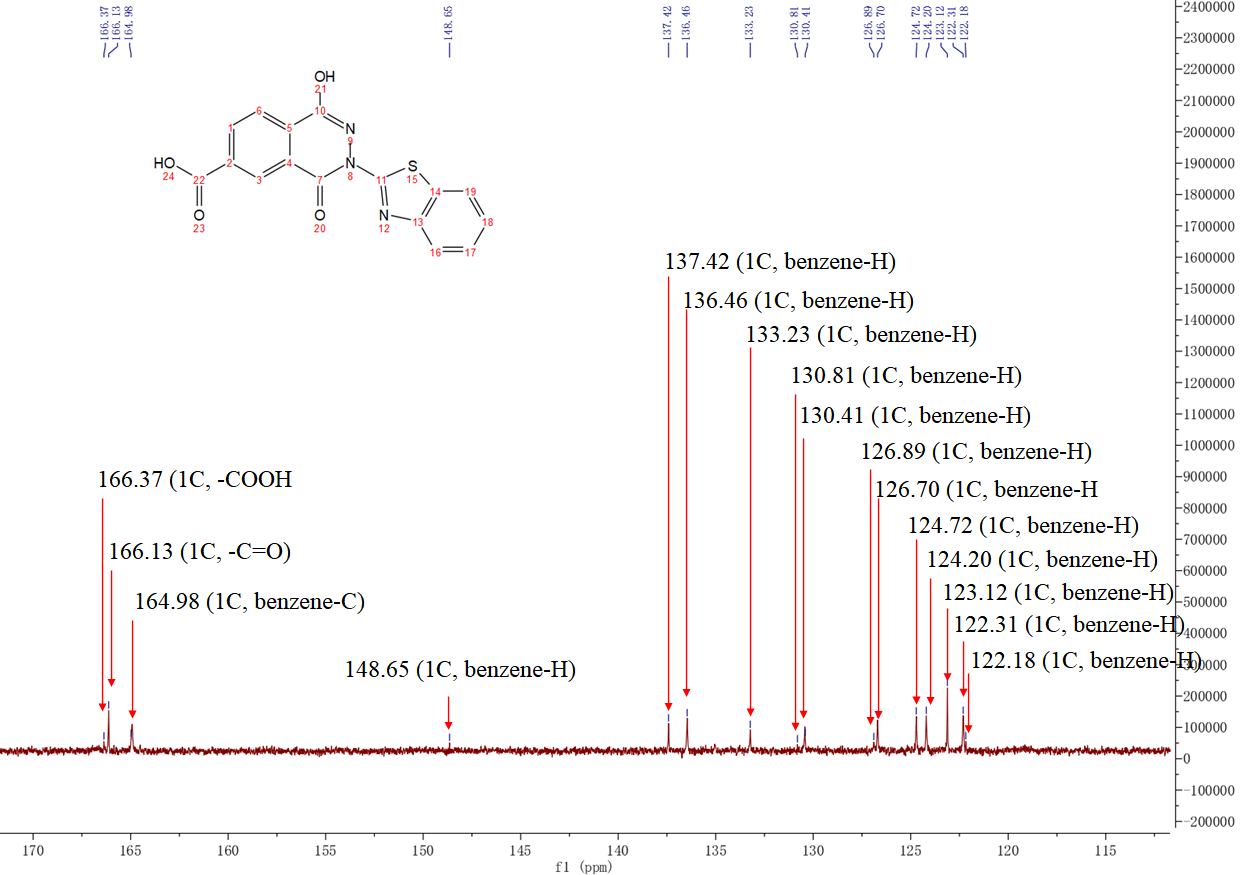


**Fig. S2.** 13C NMR (DMSO-*d*6, 600 MHz) spectra of **BPCA**.


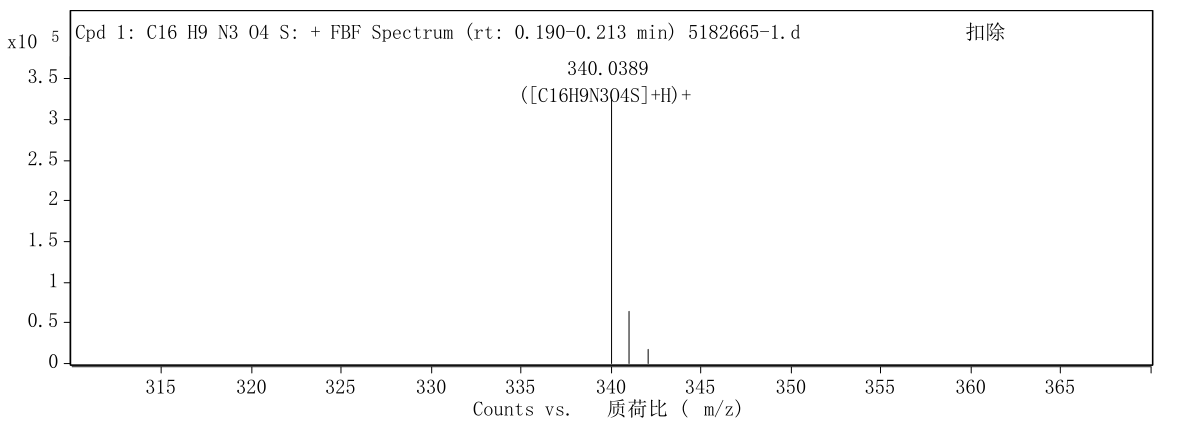


**Fig. S3.** ESI-MS spectrum of **BPCA**.


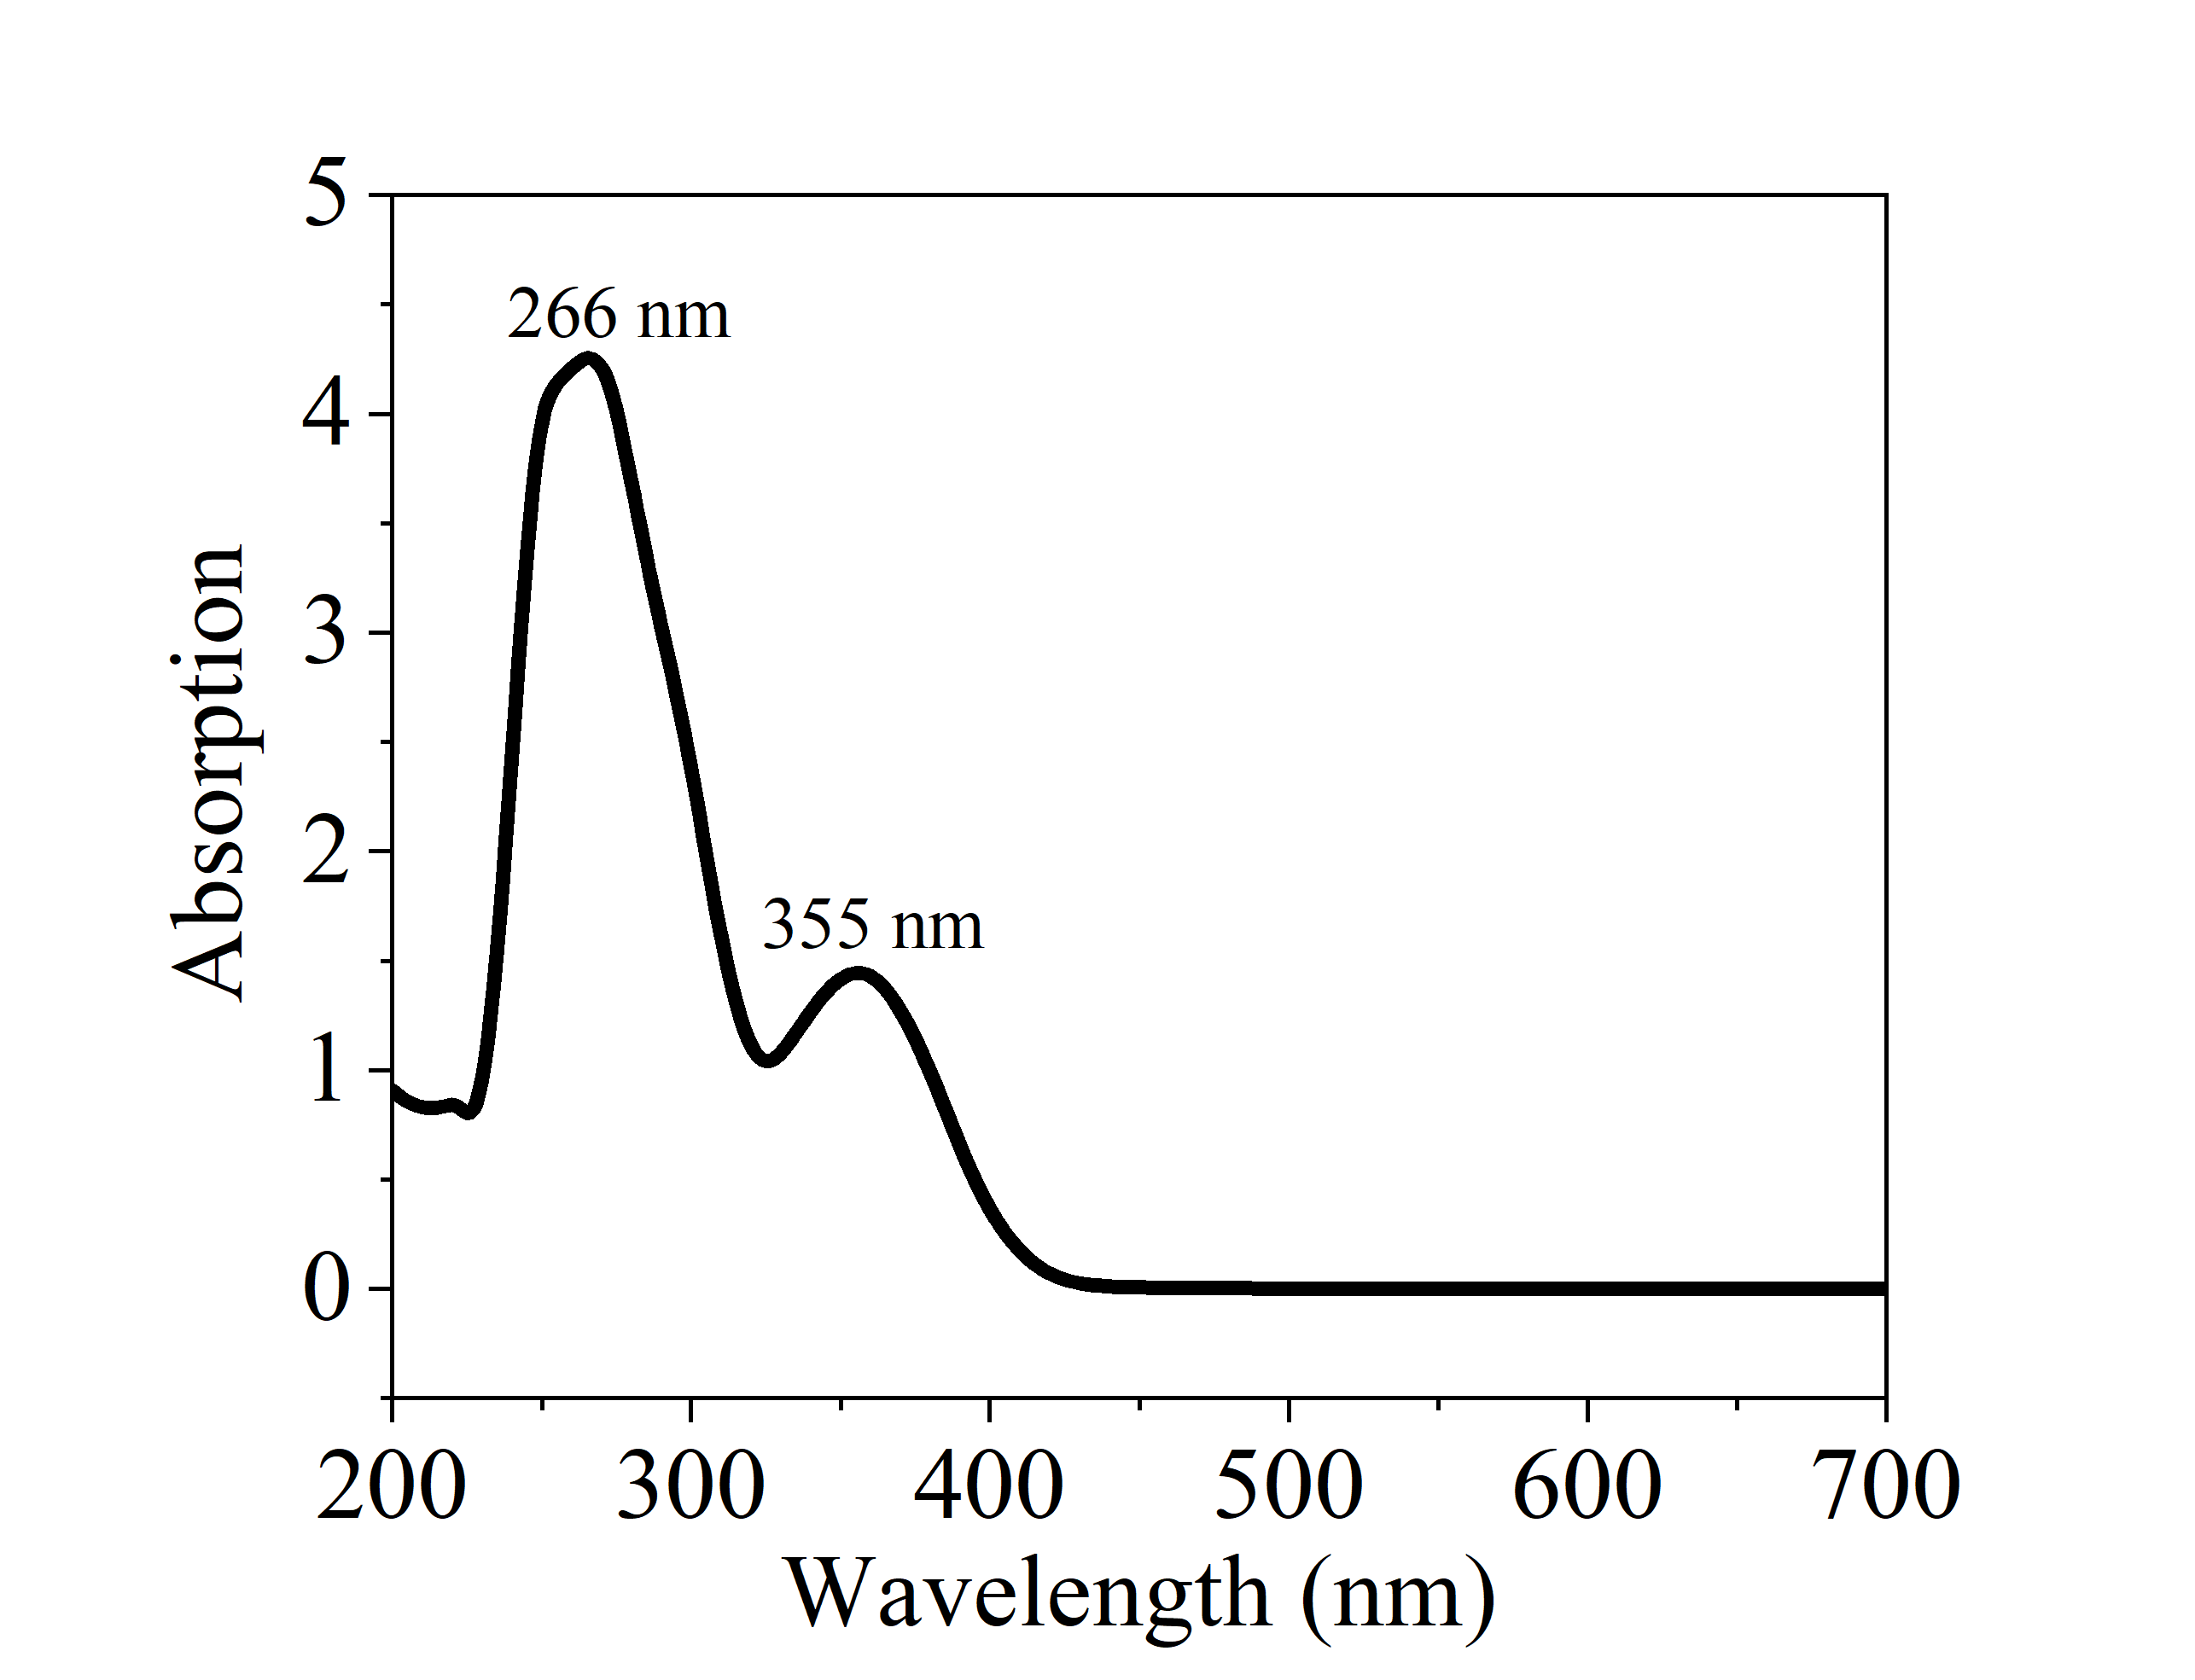


**Fig. S4.** The UV-vis spectrum of **BPCA** in1, 4-dioxane.


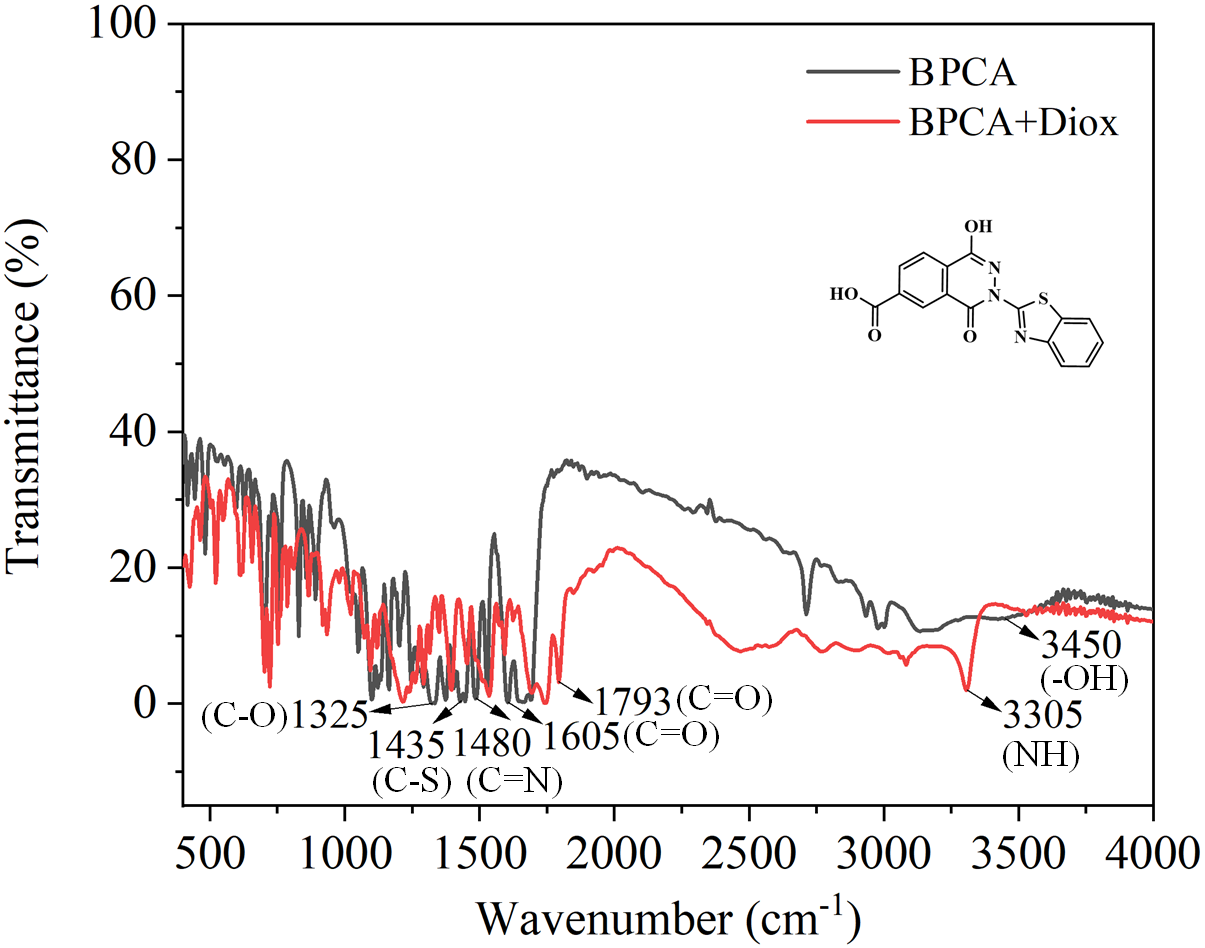


**Fig. S5.** FT-IR spectra of **BPCA**, **BPCA/1, 4-dioxane** system.


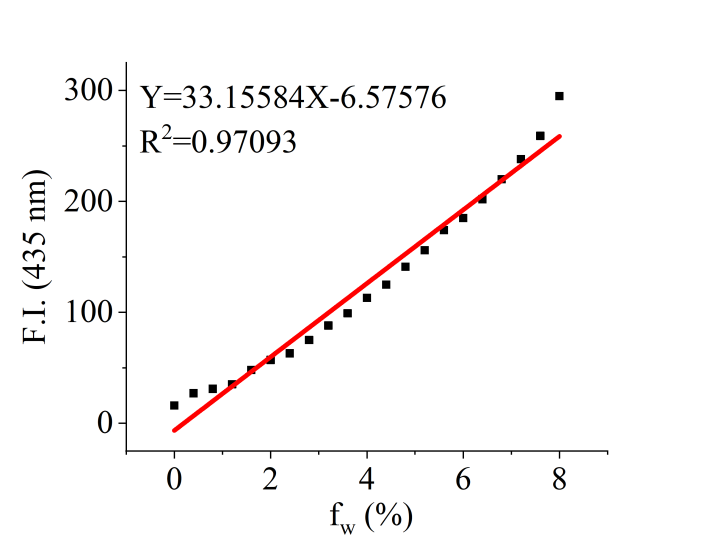


**Fig. S6.** Plot of fluorescence intensity value at 435 nm in different content of 1, 4-dioxane. λex = 360 nm, slit: 5 nm/5 nm.

**Determination of binding constants**

Assuming a 1: n stoichiometry for interaction between **BPCA** and 1, 4-dioxane., the equilibrium is given by the following equation:

**BPCA**+n1, 4-dioxane**BPCA**1, 4-dioxanen (2)

The association constant, *K*, is therefore expressed as:

(3)

, [**BPCA**] and [1, 4-dioxane] represent the equilibrium concentrations of the complex, free **BPCA**, and free 1, 4-dioxane, respectively. and are the initial concentrations of **BPCA** and 1, 4-dioxane, respectively. If ≫, the Eq. (3) can be simplified as follows:

(4)

Then it can be transformed to:

(5)

Fluorescence intensity is given by following equations:

(6)

*F*min is the fluorescence intensity of **BPCA** without cations, *F* is the fluorescence intensity of **BPCA** obtained with 1, 4-dioxane, *F*max is the fluorescence intensity of **BPCA** in the presence of excess amount of 1, 4-dioxane. In the presence of excess amount of 1, 4-dioxane, is almost equal to . Using Eqs. (5) and (6), the following equation is given:

（7）

(8)

When assuming the 1:1 stoichiometry (n = 1), Eq. (1) is obtained.

(1)


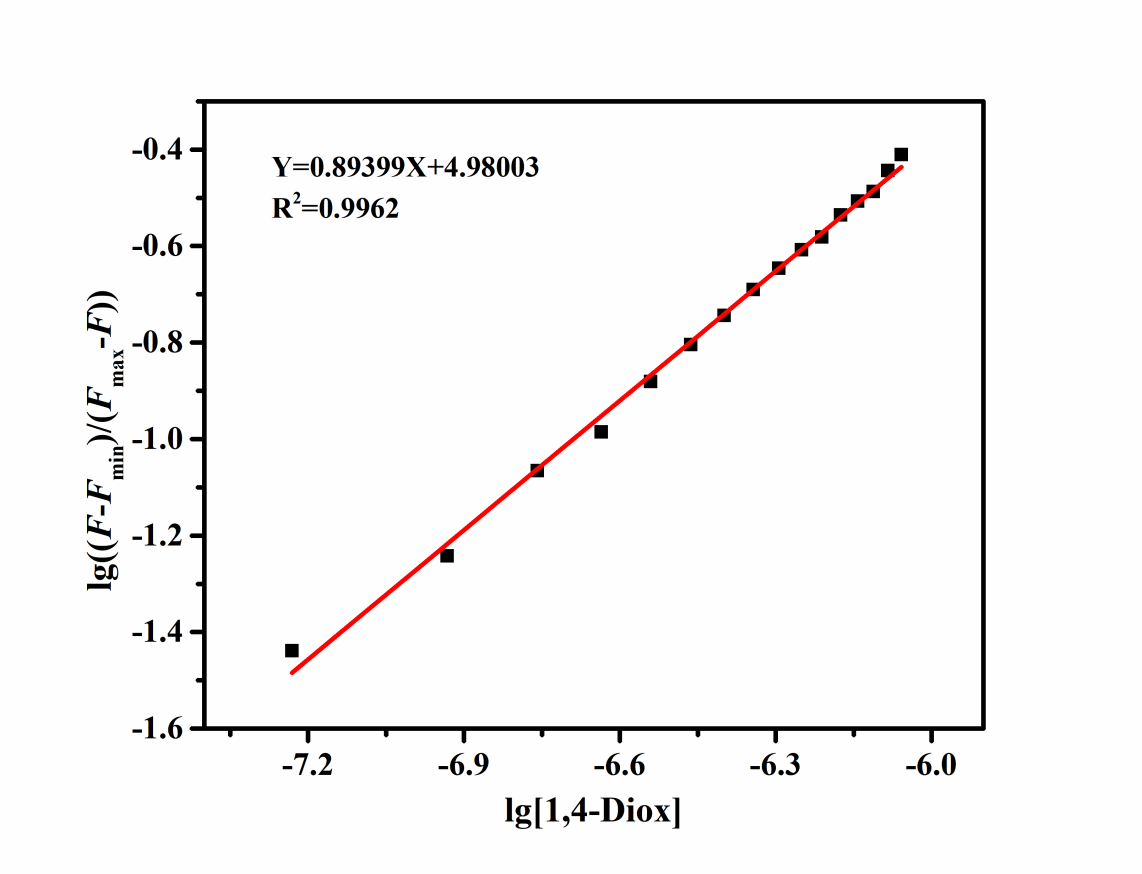


**Fig. S7.** The non-linear fitting (fluorescent emission at 435 nm) of **BPCA** lg[(*F*-*F*min)/(*F*max-*F*)] = lg*K*+lg[1, 4-dioxane]. *K* is the association constant, *F*min is the fluorescence intensity of **BPCA** without any cations, *F* is the fluorescence intensity of **BPCA** obtained with 1, 4-dioxane, *F*max is the fluorescence intensity of **BPCA** in the presence of excess amount of 1, 4-dioxane.


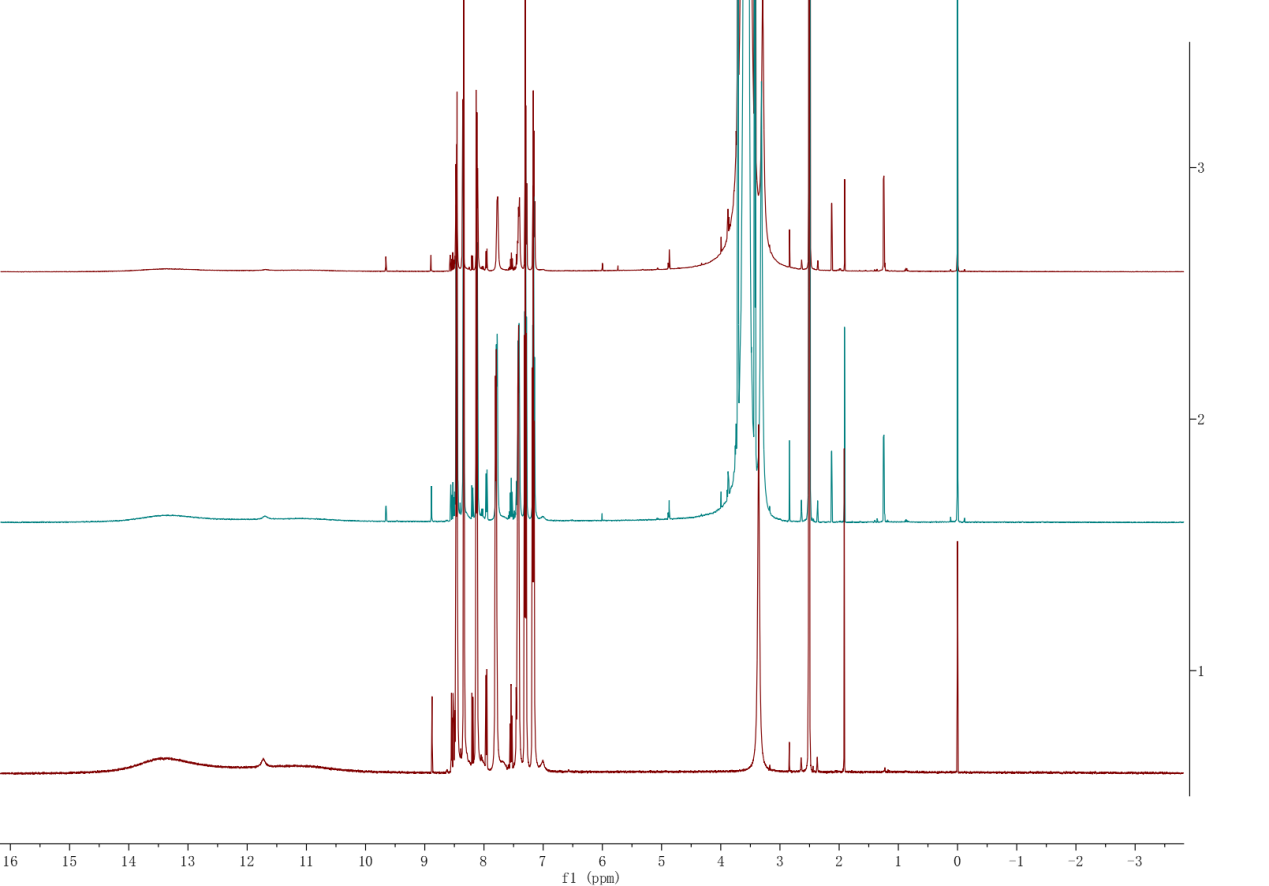


**Fig. S8.** 1H NMR spectra of **BPCA** and **BPCA/Diox** system (DMSO-*d*6, 600 MHz).

**Table S**1Probe **BPCA** for thedetermination of 1, 4-dioxanein water samples from tap and lake water

| Water samples  studied | Amount of standard 1, 4-dioxaneadded (*f*w) | Total 1, 4-dioxane found  (n=3) (μM) | Recovery of 1, 4-dioxane (n=3) added (%) | RSD  (%) | Relative  error  （%） |
| --- | --- | --- | --- | --- | --- |
| Tap water | 2% | 2.11% | 105.50 | 2.20 | 2.75 |
| 3% | 3.03% | 101.00 | 0.50 | 2.17 |
| 4% | 4.21% | 105.25 | 3.57 | 0.63 |
| 5% | 5.12% | 104.20 | 1.50 | 1.82 |
| 6% | 6.15% | 102.50 | 2.56 | 3.12 |
| 7% | 6.98% | 99.71 | 0.20 | -2.63 |
